# Supplementary material for: Influence of the cation size on the second harmonic generation response of chiral A(VO2)2(PO4)·3H2O (A = K+, NH4+ and Rb+)
Source: Royal Society of Chemistry journal article supplement (doi:10.1039/c4ce01847h), 2014-01-01
Supplement: c4ce01847h3.pdf [file c4ce01847h3.pdf]

# SUPPORTING INFORMATION

## **Influence of the Cation Size on the Second Harmonic Generation Response of Chiral $A(\text{VO}_2)_2(\text{PO}_4) \cdot 3\text{H}_2\text{O}$ ( $A=\text{K}^+$ , $\text{NH}_4^+$ and $\text{Rb}^+$ )**

Romain Gautier<sup>a,b,\*</sup>, Sandy Auguste<sup>a</sup>, Simon Clevers<sup>c</sup>, Valérie Dupray<sup>c</sup>, Gerard Coquerel<sup>c</sup> and

Eric Le Fur<sup>a,\*</sup>

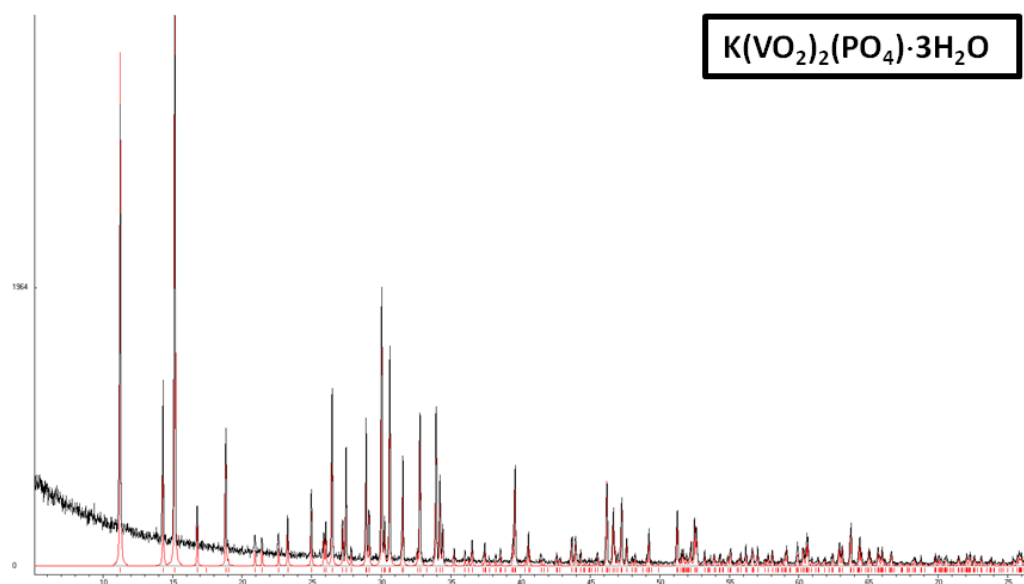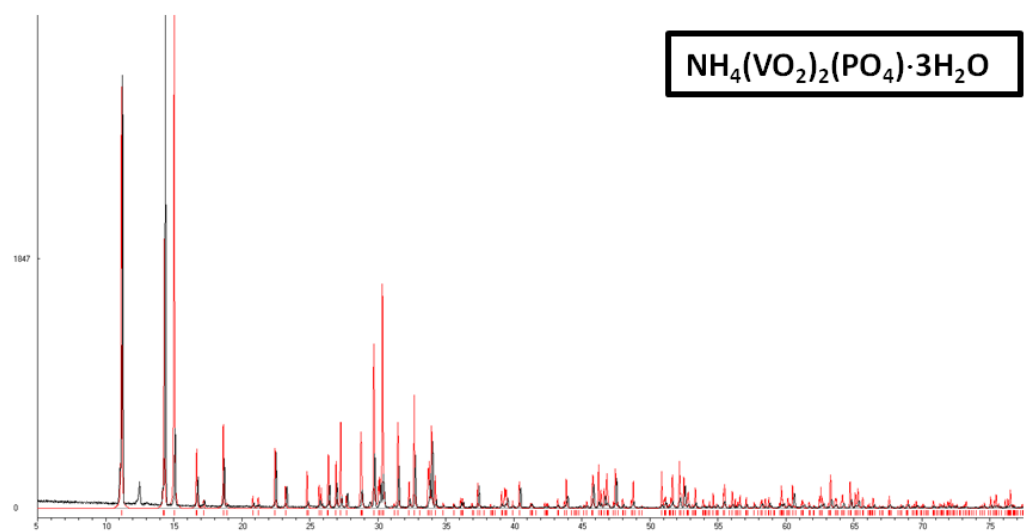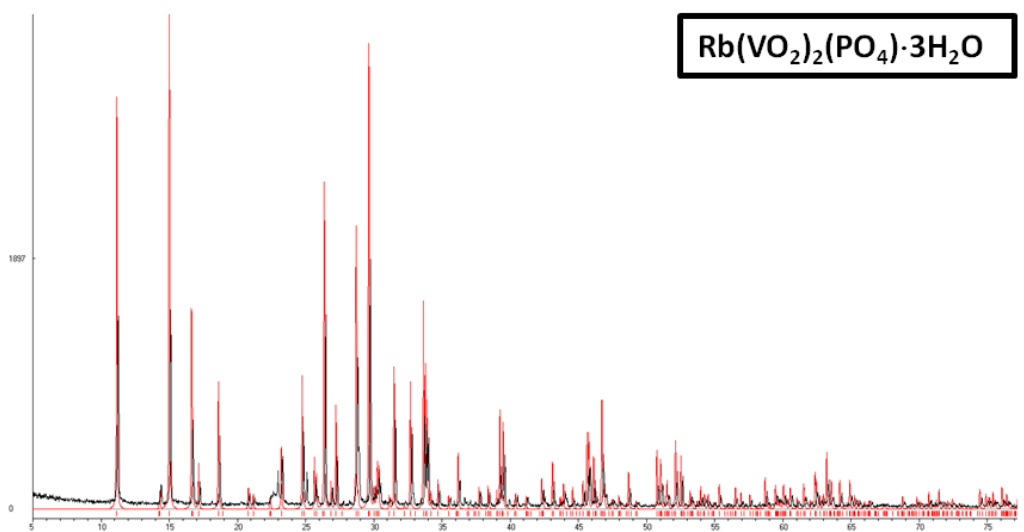

**Figure S1.** Simulated and experimental powder diffraction patterns of compounds  $\text{A}(\text{VO}_2)_2(\text{PO}_4) \cdot 3\text{H}_2\text{O}$  ( $\text{A}=\text{K}^+$ ,  $\text{NH}_4^+$  and  $\text{Rb}$ ).

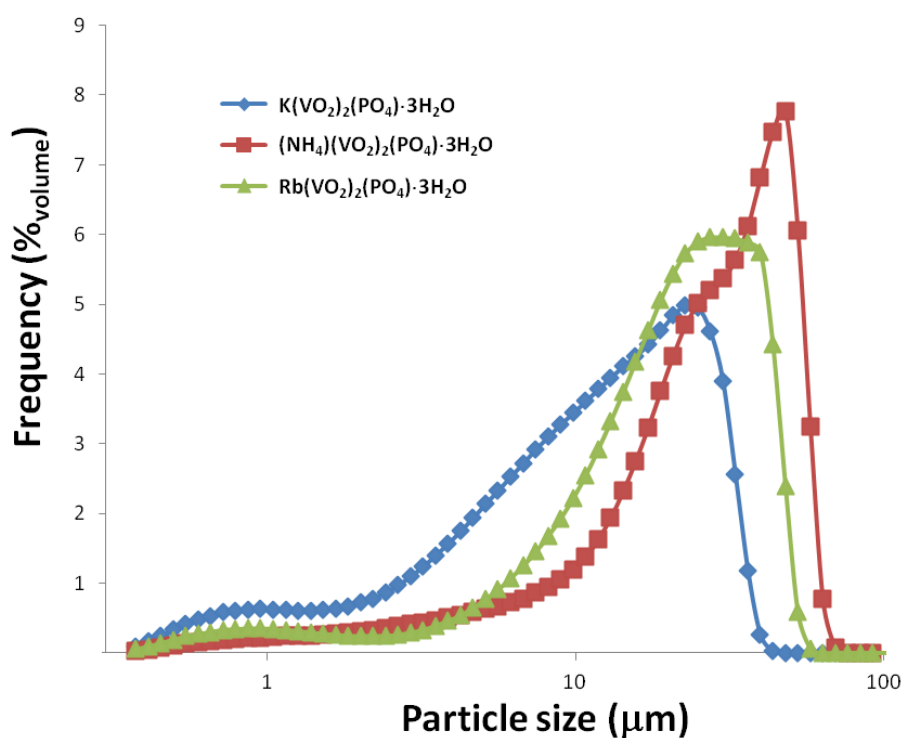

**Figure S2.** Particle size distribution for compounds  $A(VO_2)_2(PO_4) \cdot 3H_2O$  ( $A=K^+$ ,  $NH_4^+$  and  $Rb^+$ ). The average size is about 18  $\mu m$ , 25  $\mu m$  and 32  $\mu m$  for the K, Rb and  $NH_4$  analogues, respectively.

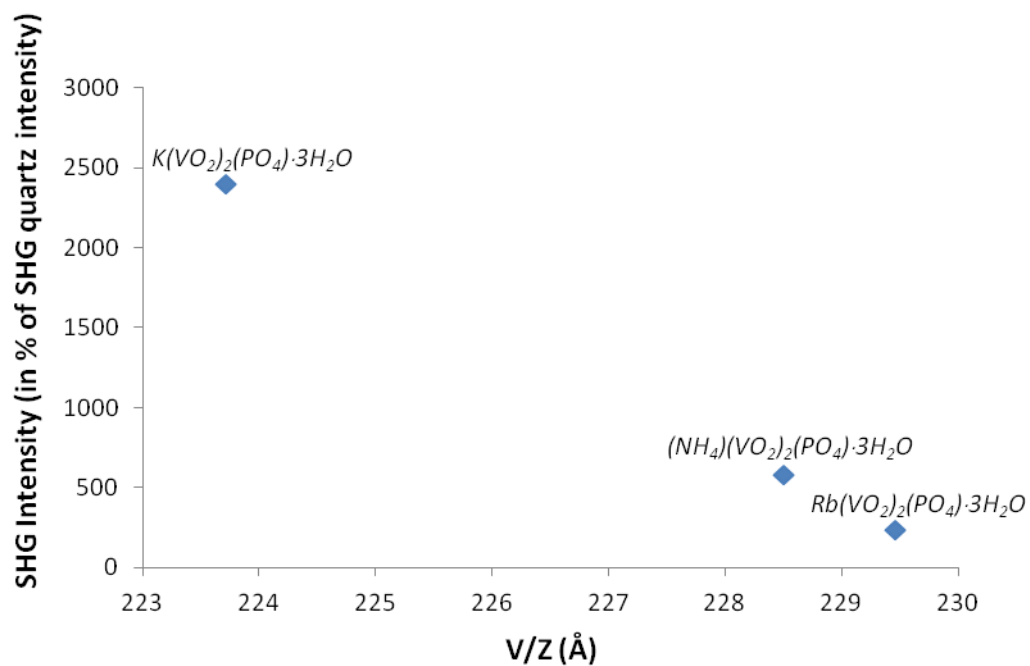

**Figure S3.** Comparison of SHG intensity of  $A(VO_2)_2(PO_4) \cdot 3H_2O$  ( $A=K^+$ ,  $NH_4^+$  and  $Rb^+$ ) materials vs. volume  $V/Z$ .
